# Supplementary material for: Identification of potent and selective N-myristoyltransferase inhibitors of Plasmodium vivax liver stage hypnozoites and schizonts
Source: PubMed Central journal article supplement (PMC10480161; doi:10.1038/s41467-023-41119-7), 2023-09-05
Supplement: 41467_2023_41119_MOESM3_ESM.pdf [file 41467_2023_41119_MOESM3_ESM.pdf]

## Reporting Summary

Nature Portfolio wishes to improve the reproducibility of the work that we publish. This form provides structure for consistency and transparency in reporting. For further information on Nature Portfolio policies, see our [Editorial Policies](#) and the [Editorial Policy Checklist](#).

### Statistics

For all statistical analyses, confirm that the following items are present in the figure legend, table legend, main text, or Methods section.

n/a Confirmed

- The exact sample size ( $n$ ) for each experimental group/condition, given as a discrete number and unit of measurement
- A statement on whether measurements were taken from distinct samples or whether the same sample was measured repeatedly
- The statistical test(s) used AND whether they are one- or two-sided  
*Only common tests should be described solely by name; describe more complex techniques in the Methods section.*
- A description of all covariates tested
- A description of any assumptions or corrections, such as tests of normality and adjustment for multiple comparisons
- A full description of the statistical parameters including central tendency (e.g. means) or other basic estimates (e.g. regression coefficient) AND variation (e.g. standard deviation) or associated estimates of uncertainty (e.g. confidence intervals)
- For null hypothesis testing, the test statistic (e.g.  $F$ ,  $t$ ,  $r$ ) with confidence intervals, effect sizes, degrees of freedom and  $P$  value noted  
*Give  $P$  values as exact values whenever suitable.*
- For Bayesian analysis, information on the choice of priors and Markov chain Monte Carlo settings
- For hierarchical and complex designs, identification of the appropriate level for tests and full reporting of outcomes
- Estimates of effect sizes (e.g. Cohen's  $d$ , Pearson's  $r$ ), indicating how they were calculated

*Our web collection on [statistics for biologists](#) contains articles on many of the points above.*

### Software and code

Policy information about [availability of computer code](#)

Data collection

Data analysis

For manuscripts utilizing custom algorithms or software that are central to the research but not yet described in published literature, software must be made available to editors and reviewers. We strongly encourage code deposition in a community repository (e.g. GitHub). See the Nature Portfolio [guidelines for submitting code & software](#) for further information.

### Data

Policy information about [availability of data](#)

All manuscripts must include a [data availability statement](#). This statement should provide the following information, where applicable:

- Accession codes, unique identifiers, or web links for publicly available datasets
- A description of any restrictions on data availability
- For clinical datasets or third party data, please ensure that the statement adheres to our [policy](#)

The raw X-ray diffraction images generated in this study have been deposited in the Integrated Resource for Reproducibility in Macromolecular Crystallography under accession code 8FBQ at <https://proteindiffraction.org/62>. Protein expression plasmids of PvNMT, HsNMT1 and HsNMT2 are available at <https://www.ssgcid.org/available-materials/ssgcid-proteins/> through a material transfer agreement (MTA). Source data are provided with this paper. The accession codes of all PDB coordinate files referenced in this study, including that of PvNMT-myrCoA-12b (8FBQ), are listed below together with the associated web addresses at the

## wwPDB:

2YNC [https://www.wwpdb.org/pdb?id=pdb\\_2YNC](https://www.wwpdb.org/pdb?id=pdb_2YNC)

2YND [https://www.wwpdb.org/pdb?id=pdb\\_2YND](https://www.wwpdb.org/pdb?id=pdb_2YND)

2YNE [https://www.wwpdb.org/pdb?id=pdb\\_2YNE](https://www.wwpdb.org/pdb?id=pdb_2YNE)

3IU1 [https://www.wwpdb.org/pdb?id=pdb\\_3IU1](https://www.wwpdb.org/pdb?id=pdb_3IU1)

3IU2 [https://www.wwpdb.org/pdb?id=pdb\\_3IU2](https://www.wwpdb.org/pdb?id=pdb_3IU2)

3IWE [https://www.wwpdb.org/pdb?id=pdb\\_3IWE](https://www.wwpdb.org/pdb?id=pdb_3IWE)

3JTK [https://www.wwpdb.org/pdb?id=pdb\\_3JTK](https://www.wwpdb.org/pdb?id=pdb_3JTK)

4A95 [https://www.wwpdb.org/pdb?id=pdb\\_4A95](https://www.wwpdb.org/pdb?id=pdb_4A95)

4B10 [https://www.wwpdb.org/pdb?id=pdb\\_4B10](https://www.wwpdb.org/pdb?id=pdb_4B10)

4B11 [https://www.wwpdb.org/pdb?id=pdb\\_4B11](https://www.wwpdb.org/pdb?id=pdb_4B11)

4B12 [https://www.wwpdb.org/pdb?id=pdb\\_4B12](https://www.wwpdb.org/pdb?id=pdb_4B12)

4B13 [https://www.wwpdb.org/pdb?id=pdb\\_4B13](https://www.wwpdb.org/pdb?id=pdb_4B13)

4B14 [https://www.wwpdb.org/pdb?id=pdb\\_4B14](https://www.wwpdb.org/pdb?id=pdb_4B14)

4BBH [https://www.wwpdb.org/pdb?id=pdb\\_4BBH](https://www.wwpdb.org/pdb?id=pdb_4BBH)

4C2Y [https://www.wwpdb.org/pdb?id=pdb\\_4C2Y](https://www.wwpdb.org/pdb?id=pdb_4C2Y)

4C2Z [https://www.wwpdb.org/pdb?id=pdb\\_4C2Z](https://www.wwpdb.org/pdb?id=pdb_4C2Z)

4C68 [https://www.wwpdb.org/pdb?id=pdb\\_4C68](https://www.wwpdb.org/pdb?id=pdb_4C68)

4CAE [https://www.wwpdb.org/pdb?id=pdb\\_4CAE](https://www.wwpdb.org/pdb?id=pdb_4CAE)

4CAF [https://www.wwpdb.org/pdb?id=pdb\\_4CAF](https://www.wwpdb.org/pdb?id=pdb_4CAF)

4UFV [https://www.wwpdb.org/pdb?id=pdb\\_4UFV](https://www.wwpdb.org/pdb?id=pdb_4UFV)

4UFW [https://www.wwpdb.org/pdb?id=pdb\\_4UFW](https://www.wwpdb.org/pdb?id=pdb_4UFW)

4UFX [https://www.wwpdb.org/pdb?id=pdb\\_4UFX](https://www.wwpdb.org/pdb?id=pdb_4UFX)

5G1Z [https://www.wwpdb.org/pdb?id=pdb\\_5G1Z](https://www.wwpdb.org/pdb?id=pdb_5G1Z)

5G22 [https://www.wwpdb.org/pdb?id=pdb\\_5G22](https://www.wwpdb.org/pdb?id=pdb_5G22)

5MU6 [https://www.wwpdb.org/pdb?id=pdb\\_5MU6](https://www.wwpdb.org/pdb?id=pdb_5MU6)

5O48 [https://www.wwpdb.org/pdb?id=pdb\\_5O48](https://www.wwpdb.org/pdb?id=pdb_5O48)

5O4V [https://www.wwpdb.org/pdb?id=pdb\\_5O4V](https://www.wwpdb.org/pdb?id=pdb_5O4V)

5O6H [https://www.wwpdb.org/pdb?id=pdb\\_5O6H](https://www.wwpdb.org/pdb?id=pdb_5O6H)

5O6J [https://www.wwpdb.org/pdb?id=pdb\\_5O6J](https://www.wwpdb.org/pdb?id=pdb_5O6J)

5NPQ [https://www.wwpdb.org/pdb?id=pdb\\_5NPQ](https://www.wwpdb.org/pdb?id=pdb_5NPQ)

5O9S [https://www.wwpdb.org/pdb?id=pdb\\_5O9S](https://www.wwpdb.org/pdb?id=pdb_5O9S)

5O9T [https://www.wwpdb.org/pdb?id=pdb\\_5O9T](https://www.wwpdb.org/pdb?id=pdb_5O9T)

5O9U [https://www.wwpdb.org/pdb?id=pdb\\_5O9U](https://www.wwpdb.org/pdb?id=pdb_5O9U)

5O9V [https://www.wwpdb.org/pdb?id=pdb\\_5O9V](https://www.wwpdb.org/pdb?id=pdb_5O9V)

5UUT [https://www.wwpdb.org/pdb?id=pdb\\_5UUT](https://www.wwpdb.org/pdb?id=pdb_5UUT)

5V0W [https://www.wwpdb.org/pdb?id=pdb\\_5V0W](https://www.wwpdb.org/pdb?id=pdb_5V0W)

5V0X [https://www.wwpdb.org/pdb?id=pdb\\_5V0X](https://www.wwpdb.org/pdb?id=pdb_5V0X)

6B1L [https://www.wwpdb.org/pdb?id=pdb\\_6B1L](https://www.wwpdb.org/pdb?id=pdb_6B1L)6FZ2 [https://www.wwpdb.org/pdb?id=pdb\\_6FZ2](https://www.wwpdb.org/pdb?id=pdb_6FZ2)6FZ3 [https://www.wwpdb.org/pdb?id=pdb\\_6FZ3](https://www.wwpdb.org/pdb?id=pdb_6FZ3)6FZ5 [https://www.wwpdb.org/pdb?id=pdb\\_6FZ5](https://www.wwpdb.org/pdb?id=pdb_6FZ5)6MB1 [https://www.wwpdb.org/pdb?id=pdb\\_6MB1](https://www.wwpdb.org/pdb?id=pdb_6MB1)6NXG [https://www.wwpdb.org/pdb?id=pdb\\_6NXG](https://www.wwpdb.org/pdb?id=pdb_6NXG)6PAV [https://www.wwpdb.org/pdb?id=pdb\\_6PAV](https://www.wwpdb.org/pdb?id=pdb_6PAV)6EHJ [https://www.wwpdb.org/pdb?id=pdb\\_6EHJ](https://www.wwpdb.org/pdb?id=pdb_6EHJ)6QRM [https://www.wwpdb.org/pdb?id=pdb\\_6QRM](https://www.wwpdb.org/pdb?id=pdb_6QRM)6SJZ [https://www.wwpdb.org/pdb?id=pdb\\_6SJZ](https://www.wwpdb.org/pdb?id=pdb_6SJZ)6SK2 [https://www.wwpdb.org/pdb?id=pdb\\_6SK2](https://www.wwpdb.org/pdb?id=pdb_6SK2)6TW5 [https://www.wwpdb.org/pdb?id=pdb\\_6TW5](https://www.wwpdb.org/pdb?id=pdb_6TW5)6TW6 [https://www.wwpdb.org/pdb?id=pdb\\_6TW6](https://www.wwpdb.org/pdb?id=pdb_6TW6)7RK3 [https://www.wwpdb.org/pdb?id=pdb\\_7RK3](https://www.wwpdb.org/pdb?id=pdb_7RK3)8FBQ [https://www.wwpdb.org/pdb?id=pdb\\_8FBQ](https://www.wwpdb.org/pdb?id=pdb_8FBQ)

## Research involving human participants, their data, or biological material

Policy information about studies with [human participants or human data](#). See also policy information about [sex, gender \(identity/presentation\), and sexual orientation](#) and [race, ethnicity and racism](#).

Reporting on sex and gender

The volunteers who donated blood to obtain P. vivax-infected mosquitoes were obtained as part of a separate study, and thus are de-identified as part of this study. For this reason, we are unable to report on the volunteer population.

Reporting on race, ethnicity, or other socially relevant groupings

See above.

Population characteristics

See above.

Recruitment

See above.

Ethics oversight

See above.

Note that full information on the approval of the study protocol must also be provided in the manuscript.

## Field-specific reporting

Please select the one below that is the best fit for your research. If you are not sure, read the appropriate sections before making your selection.

Life sciences       Behavioural & social sciences       Ecological, evolutionary & environmental sciences

For a reference copy of the document with all sections, see [nature.com/documents/nr-reporting-summary-flat.pdf](https://www.nature.com/documents/nr-reporting-summary-flat.pdf)

## Life sciences study design

All studies must disclose on these points even when the disclosure is negative.

Sample size

Sample size of three technical replicates per biological replicate and three biological replicates was used for statistical analysis.

Data exclusions

No data were excluded.

Replication

Replication was successful. P. vivax experiments could only be performed once per isolate as each comes from a unique individual.

Randomization

Location of compounds on the plate was randomized

Blinding

Quantification was performed with blinding to treatment.

# Reporting for specific materials, systems and methods

We require information from authors about some types of materials, experimental systems and methods used in many studies. Here, indicate whether each material, system or method listed is relevant to your study. If you are not sure if a list item applies to your research, read the appropriate section before selecting a response.

## Materials & experimental systems

| n/a                                 | Involvement                                               |
|-------------------------------------|-----------------------------------------------------------|
| <input type="checkbox"/>            | <input checked="" type="checkbox"/> Antibodies            |
| <input type="checkbox"/>            | <input checked="" type="checkbox"/> Eukaryotic cell lines |
| <input checked="" type="checkbox"/> | <input type="checkbox"/> Palaeontology and archaeology    |
| <input checked="" type="checkbox"/> | <input type="checkbox"/> Animals and other organisms      |
| <input checked="" type="checkbox"/> | <input type="checkbox"/> Clinical data                    |
| <input checked="" type="checkbox"/> | <input type="checkbox"/> Dual use research of concern     |
| <input checked="" type="checkbox"/> | <input type="checkbox"/> Plants                           |

## Methods

| n/a                                 | Involvement                                     |
|-------------------------------------|-------------------------------------------------|
| <input checked="" type="checkbox"/> | <input type="checkbox"/> ChIP-seq               |
| <input checked="" type="checkbox"/> | <input type="checkbox"/> Flow cytometry         |
| <input checked="" type="checkbox"/> | <input type="checkbox"/> MRI-based neuroimaging |

## Antibodies

|                 |                                                                                                                                                                                                        |
|-----------------|--------------------------------------------------------------------------------------------------------------------------------------------------------------------------------------------------------|
| Antibodies used | P. vivax UIS4-targeting antibody provided by Sather lab. For antibody dilutions PvUIS4 was diluted 1:250 and secondary antibody was anti-mouse AlexaFluor-594 diluted 1:1000. DAPI was diluted 1:2000. |
| Validation      | Validated in Schafer et al 2018, Malaria Journal.                                                                                                                                                      |

## Eukaryotic cell lines

Policy information about [cell lines and Sex and Gender in Research](#)

|                                                                      |                                                    |
|----------------------------------------------------------------------|----------------------------------------------------|
| Cell line source(s)                                                  | Primary human hepatocytes from Bio IVT             |
| Authentication                                                       | Lot authenticated by Both et al. 2028, Nat Commun. |
| Mycoplasma contamination                                             | Not tested for mycoplasma                          |
| Commonly misidentified lines<br>(See <a href="#">ICLAC</a> register) | n/a                                                |
